# Supplementary material
Source: MDPI journal article supplement (https://www.mdpi.com/2073-4441/12/5/1483)
Supplement: s1 [file s1]

# Coupled Microbiological–Isotopic Approach for Studying Hydrodynamics in Deep Reservoirs: The Case of the Val d’Agri Oilfield (Southern Italy)

Pietro Rizzo<sup>1</sup>, Antonio Bucci<sup>2,\*</sup>, Anna Maria Sanangelantoni<sup>1</sup>, Paola Iacumin<sup>1</sup> and Fulvio Celico<sup>1</sup>

<sup>1</sup> Department of Chemistry, Life Sciences and Environmental Sustainability, University of Parma, Parco Area delle Scienze 157/A, 43124 Parma, Italy; pietro.rizzo2@studenti.unipr.it (P.R.); annamaria.sanangelantoni@unipr.it (A.M.S.); paola.iacumin@unipr.it (P.I.); fulvio.celico@unipr.it (F.C.)

<sup>2</sup> Department of Biosciences and Territory, University of Molise, C.da Fonte Lappone, 86090 Pesche, Italy

\* Correspondence: antonio.bucci@unimol.it; Tel.: +39-0874-404156

Received: 31 March 2020; Accepted: 20 May 2020; Published: date

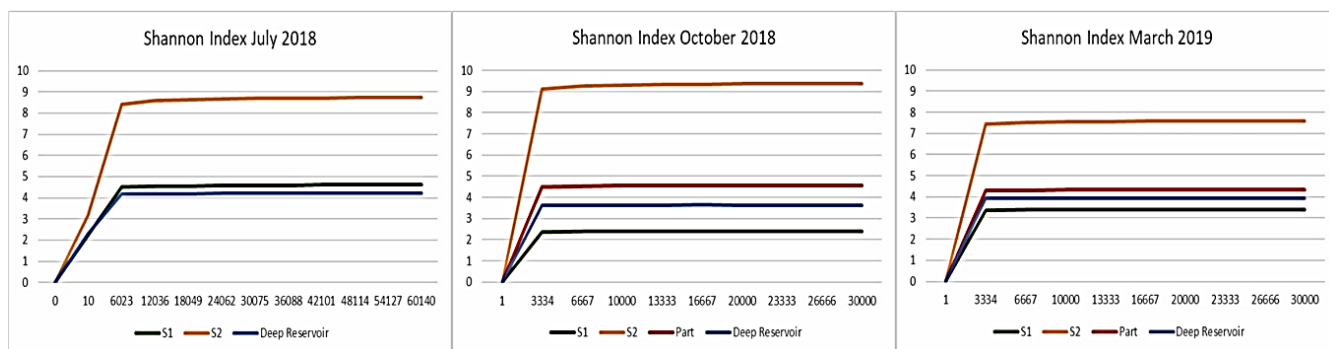

**Figure S1.** Rarefaction curves of spring, groundwater, and deep reservoir samples collected in July 2018, October 2018 and March 2019. The alpha diversity plots were obtained by using the Shannon index.
